# Supplementary material for: Bifidobacterial β-Galactosidase-Mediated Production of Galacto-Oligosaccharides: Structural and Preliminary Functional Assessments
Source: Frontiers journal article supplement (doi:10.3389/fmicb.2021.750635), 2021-10-28
Supplement: Data_Sheet_1.PDF [file Data_Sheet_1.PDF]

## Supplementary material

**Supplementary Table S1.** GOS sample quantification from GOS assay related to BgaC experiment

| Enzyme           | galactose<br>(%) | glucose<br>(%) | allo-lactose<br>(%) | lactose<br>(%) | lactulose<br>(%) | GOS<br>(%) |
|------------------|------------------|----------------|---------------------|----------------|------------------|------------|
| <b>BgaC 12Lu</b> | 9.83             | 14.48          | 0.44                | 65.07          | 1.51             | 8.7        |
| <b>BgaC 16Lu</b> | 11.61            | 16.68          | 0.57                | 57.02          | 1.00             | 13.1       |

**Supplementary Table S2a** GOS sample quantification from GOS assay related to BgaD experiment 40% lactose, 55°C, 12, 16, 20, 30 Lu/g

| <b>Enzyme</b>        | <b>galactose (%)</b> | <b>glucose (%)</b> | <b>allo-lactose (%)</b> | <b>lactose (%)</b> | <b>lactulose (%)</b> | <b>GOS (%)</b> |
|----------------------|----------------------|--------------------|-------------------------|--------------------|----------------------|----------------|
| <b>BgaD 12Lu 08h</b> | 12.68                | 20.05              | 1.01                    | 51.52              | 1.24                 | 13.5           |
| <b>BgaD 12Lu 10h</b> | 14.67                | 22.62              | 1.28                    | 47.42              | 1.05                 | 13.0           |
| <b>BgaD 12Lu 12h</b> | 15.46                | 23.41              | 1.54                    | 43.76              | 1.16                 | 14.7           |
| <b>BgaD 16Lu 08h</b> | 14.76                | 22.68              | 1.30                    | 46.41              | 1.15                 | 13.7           |
| <b>BgaD 16Lu 10h</b> | 16.85                | 25.23              | 1.72                    | 41.65              | 1.04                 | 13.5           |
| <b>BgaD 16Lu 12h</b> | 17.65                | 25.96              | 1.71                    | 38.07              | 1.07                 | 15.5           |
| <b>BgaD 20LU 5H</b>  | 10.72                | 17.29              | 0.64                    | 55.40              | 1.35                 | 14.6           |
| <b>BgaD 20LU 6H</b>  | 11.61                | 18.40              | 0.74                    | 50.83              | 1.18                 | 17.2           |
| <b>BgaD 20LU 7H</b>  | 12.45                | 19.54              | 0.84                    | 48.96              | 1.18                 | 17.0           |
| <b>BgaD 20LU 8H</b>  | 13.42                | 20.87              | 0.93                    | 46.50              | 1.10                 | 17.2           |
| <b>BgaD 30LU 4H</b>  | 11.28                | 17.83              | 0.84                    | 46.55              | 1.14                 | 22.4           |
| <b>BgaD 30LU 5H</b>  | 14.05                | 21.38              | 1.02                    | 41.89              | 1.03                 | 20.6           |
| <b>BgaD 30LU 6H</b>  | 15.05                | 22.56              | 1.18                    | 38.73              | 0.97                 | 21.5           |
| <b>BgaD 30LU 7H</b>  | 16.51                | 24.35              | 1.35                    | 37.45              | 0.98                 | 19.4           |
| <b>BgaD 30LU 8H</b>  | 17.61                | 25.50              | 1.50                    | 34.67              | 0.86                 | 19.8           |

**Supplementary Table S2b** GOS sample quantification from the GOS producing assay corresponding to BgaD used at 4, 8, 16, 24 Lu/g lactose, with 30% lactose, and performed at 55°C.

|                       | galactose<br>(%) | glucose<br>(%) | allo-lactose<br>(%) | lactose<br>(%) | lactulose<br>(%) | GOS<br>(%) |
|-----------------------|------------------|----------------|---------------------|----------------|------------------|------------|
| <b>BgaD 4LU-0.5h</b>  | 0.47             | 1.23           | n.a.                | 92.71          | 1.65             | 3.9        |
| <b>BgaD 4LU-1h</b>    | 0.78             | 1.96           | n.a.                | 88.46          | 1.78             | 7.0        |
| <b>BgaD 4LU-2h</b>    | 1.62             | 3.58           | n.a.                | 84.35          | 1.46             | 9.0        |
| <b>BgaD 4LU-3h</b>    | 2.53             | 5.19           | n.a.                | 82.61          | 1.73             | 7.9        |
| <b>BgaD 4LU-4h</b>    | 3.01             | 6.00           | n.a.                | 78.97          | 1.42             | 10.6       |
| <b>BgaD 4LU-5h</b>    | 3.54             | 6.89           | n.a.                | 78.56          | 1.61             | 9.4        |
| <b>BgaD 4LU-6h</b>    | 4.28             | 7.95           | n.a.                | 76.01          | 1.36             | 10.4       |
| <b>BgaD 4LU-8h</b>    | 4.81             | 8.75           | 0.07                | 73.89          | 1.27             | 11.2       |
| <b>BgaD 8LU-0.5h</b>  | 1.20             | 2.77           | n.a.                | 87.36          | 1.46             | 7.2        |
| <b>BgaD 8LU-1h</b>    | 2.10             | 4.41           | n.a.                | 81.55          | 1.32             | 10.6       |
| <b>BgaD 8LU-2h</b>    | 4.25             | 7.89           | n.a.                | 75.17          | 1.22             | 11.5       |
| <b>BgaD 8LU-3h</b>    | 6.21             | 10.73          | 0.15                | 68.59          | 1.29             | 13.0       |
| <b>BgaD 8LU-4h</b>    | 7.43             | 12.24          | 0.22                | 65.48          | 1.04             | 13.6       |
| <b>BgaD 8LU-5h</b>    | 8.59             | 13.84          | 0.27                | 62.47          | 1.37             | 13.5       |
| <b>BgaD 8LU-6h</b>    | 9.99             | 15.53          | 0.55                | 59.73          | 1.31             | 12.9       |
| <b>BbglIV 8LU-8h</b>  | 11.33            | 17.21          | 0.44                | 57.65          | 0.87             | 12.5       |
| <b>BgaD 16LU-0.5h</b> | 2.50             | 5.14           | n.a.                | 81.64          | 0.95             | 9.8        |
| <b>BgaD 16LU-1h</b>   | 4.31             | 8.05           | 0.08                | 75.33          | 0.98             | 11.2       |
| <b>BgaD 16LU-2h</b>   | 11.06            | 16.90          | 0.46                | 55.42          | 1.14             | 15.0       |
| <b>BgaD 16LU-3h</b>   | 8.08             | 13.29          | 0.27                | 64.45          | 1.09             | 12.8       |
| <b>BgaD 16LU-4h</b>   | 13.05            | 19.36          | 0.60                | 52.67          | 0.79             | 13.5       |
| <b>BgaD 16LU-5h</b>   | 14.73            | 21.27          | 0.73                | 48.55          | 0.93             | 13.8       |
| <b>BgaD 16LU-6h</b>   | 16.78            | 23.46          | 1.03                | 45.05          | 0.94             | 12.7       |
| <b>BgaD 16LU-8h</b>   | 18.37            | 25.25          | 1.20                | 41.26          | 0.82             | 13.1       |
| <b>BgaD 24LU-0.5h</b> | 3.81             | 7.37           | n.a.                | 78.00          | 1.17             | 9.6        |
| <b>BgaD 24LU-1h</b>   | 6.31             | 10.99          | 0.15                | 69.18          | 0.99             | 12.4       |
| <b>BgaD 24LU-2h</b>   | 11.17            | 17.07          | 0.48                | 55.67          | 0.80             | 14.8       |
| <b>BgaD 24LU-3h</b>   | 15.10            | 21.55          | 0.83                | 47.19          | 0.88             | 14.5       |
| <b>BgaD 24LU-4h</b>   | 17.10            | 23.76          | 0.97                | 42.14          | 0.85             | 15.2       |
| <b>BgaD 24LU-5h</b>   | 19.46            | 26.44          | 1.17                | 39.29          | 0.70             | 12.9       |
| <b>BgaD 24LU-6h</b>   | 21.56            | 28.50          | 1.36                | 35.21          | 0.75             | 12.6       |
| <b>BgaD 24LU-8h</b>   | 23.77            | 30.90          | 1.55                | 32.06          | 0.64             | 11.1       |

**Supplementary Table S3.** GOS sample quantification from the GOS production assay corresponding to BgaA used at 4, 8 and 11 Lu/g lactose, with 50 % lactose as starting substrate level, and performed at 50°C.

| Enzyme                | galactose<br>(%) | glucose<br>(%) | allo-lactose<br>(%) | lactose<br>(%) | lactulose<br>(%) | GOS<br>(%) |
|-----------------------|------------------|----------------|---------------------|----------------|------------------|------------|
| <b>BgaA 4Lu 6h</b>    | 2.64             | 5.81           | 2.43                | 75             | 1.22             | 12.9       |
| <b>BgaA 8Lu 1.5h</b>  | 13.29            | 21.49          | 10.12               | 40.11          | 0.75             | 14.2       |
| <b>BgaA 8Lu 3h</b>    | 19.66            | 29.08          | 11.43               | 20.39          | 0.48             | 19         |
| <b>BgaA 8Lu 5h</b>    | 26.78            | 36.5           | 10.41               | 9.22           | 0.29             | 16.8       |
| <b>BgaA 8Lu 6h</b>    | 29.04            | 38.69          | 9.48                | 6.57           | 0.18             | 16         |
| <b>BgaA 11Lu 1.5h</b> | 17.46            | 26.47          | 11.14               | 25.37          | 0.56             | 19         |
| <b>BgaA 11Lu 3h</b>   | 26.9             | 36.87          | 10.36               | 9.42           | n.a.             | 16.5       |
| <b>BgaA 11Lu 5h</b>   | 34.43            | 43.74          | 6.91                | 2.47           | n.a.             | 12.5       |
| <b>BgaA 11Lu 6h</b>   | 35.83            | 44.72          | 5.84                | 1.55           | n.a.             | 12.1       |

**Supplementary Table S4.** GOS sample quantification from the GOS production assay corresponding to BgaE used at 2, 4 and 6 Li.g lactose, with 50% lactose, and performed at 50 °C.

| Enzyme               | galactose<br>(%) | glucose<br>(%) | allo-lactose<br>(%) | lactose<br>(%) | lactulose<br>(%) | GOS<br>(%) |
|----------------------|------------------|----------------|---------------------|----------------|------------------|------------|
| <b>BgaE 2Lu 05h</b>  | 3.6              | 12.11          | 9.93                | 50.24          | 1.04             | 23.1       |
| <b>BgaE 2Lu 10h</b>  | 4.61             | 15.13          | 13.22               | 36.58          | 0.6              | 29.9       |
| <b>BgaE 2Lu 12h</b>  | 4.99             | 16.19          | 14.32               | 33.16          | 0.58             | 30.8       |
| <b>BgaE 4LU 3h</b>   | 6.07             | 18.98          | 17.01               | 24.94          | 0.44             | 32.6       |
| <b>BgaE 4LU 5h</b>   | 7.88             | 22.65          | 19.17               | 13.5           | 0.33             | 36.5       |
| <b>BgaE 4LU 7h</b>   | 9.76             | 25.63          | 19.64               | 7.93           | 0.22             | 36.8       |
| <b>BgaE 4LU 9h</b>   | 10.31            | 25.58          | 18.09               | 5.63           | 0.13             | 40.3       |
| <b>BgaE 6LU 1.5h</b> | 5.21             | 16.87          | 15.21               | 32.75          | 0.67             | 29.3       |
| <b>BgaE 6LU 3h</b>   | 7.66             | 22.23          | 19.16               | 13.97          | 0.33             | 36.6       |
| <b>BgaE 6LU 5h</b>   | 10.06            | 25.94          | 19.17               | 6.62           | 0.19             | 38         |
| <b>BgaE 6LU 7h</b>   | 12.6             | 29.28          | 18.16               | 4.14           | 0.08             | 35.7       |

**Supplementary Table S5** Adhesion experiment conducted with *Salmonella typhimurium* 4/74 and PureViv.

|                  | <b>Replicates (%)</b> |           |            |
|------------------|-----------------------|-----------|------------|
| <b>Substrate</b> | <b>I</b>              | <b>II</b> | <b>III</b> |
| <b>Control</b>   | 100.0                 | 100.0     | 100.0      |
| <b>0.5 %</b>     | 211.4                 | 468.7     | 119.1      |
| <b>5 %</b>       | 125.6                 | 522.3     | 70.7       |
| <b>25 %</b>      | 79.7                  | 406.7     | 646.5      |
| <b>Mono Mix</b>  | 0.0                   | 72.9      | 80.3       |

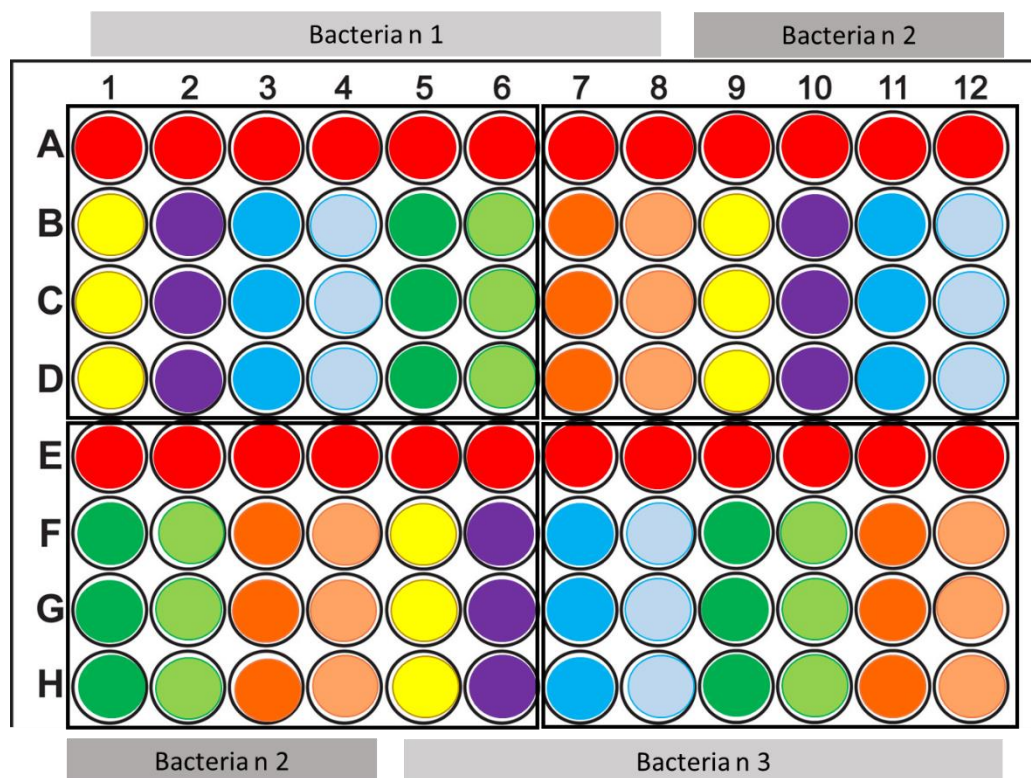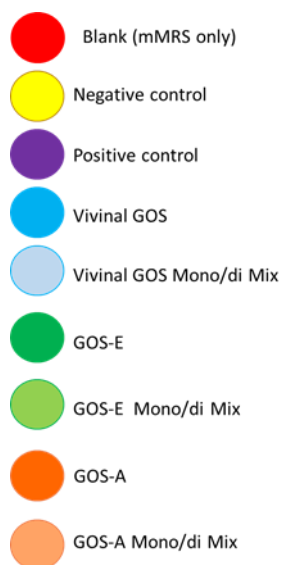

**Supplementary Figure S1.** 96 wells plate set up for bacterial growth assay.

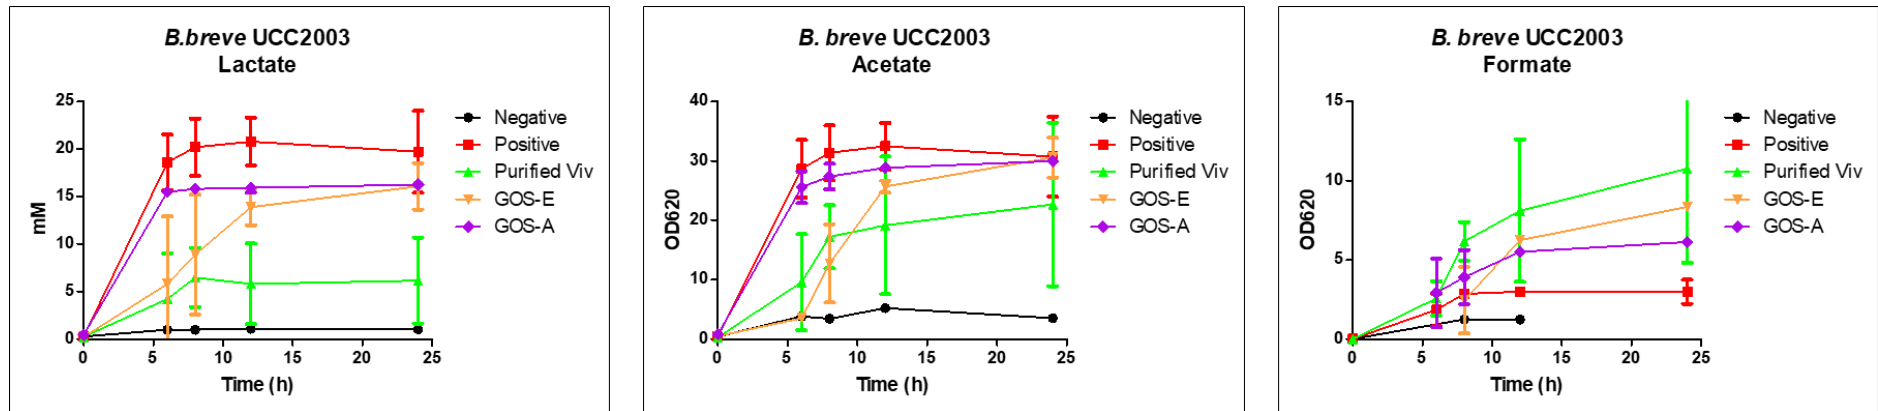

**Supplementary Figure S2.a** SCFA production resulting from *B. breve* UCC2003 growth on novel purified GOS preparations. Negative: no sugar, Positive: lactose, Purified Viv: Pure Viv, GOS-E: purified GOS obtained by enzymatic reaction employing BgaE, GOS-A: purified GOS obtain by enzymatic reaction employing BgaA.

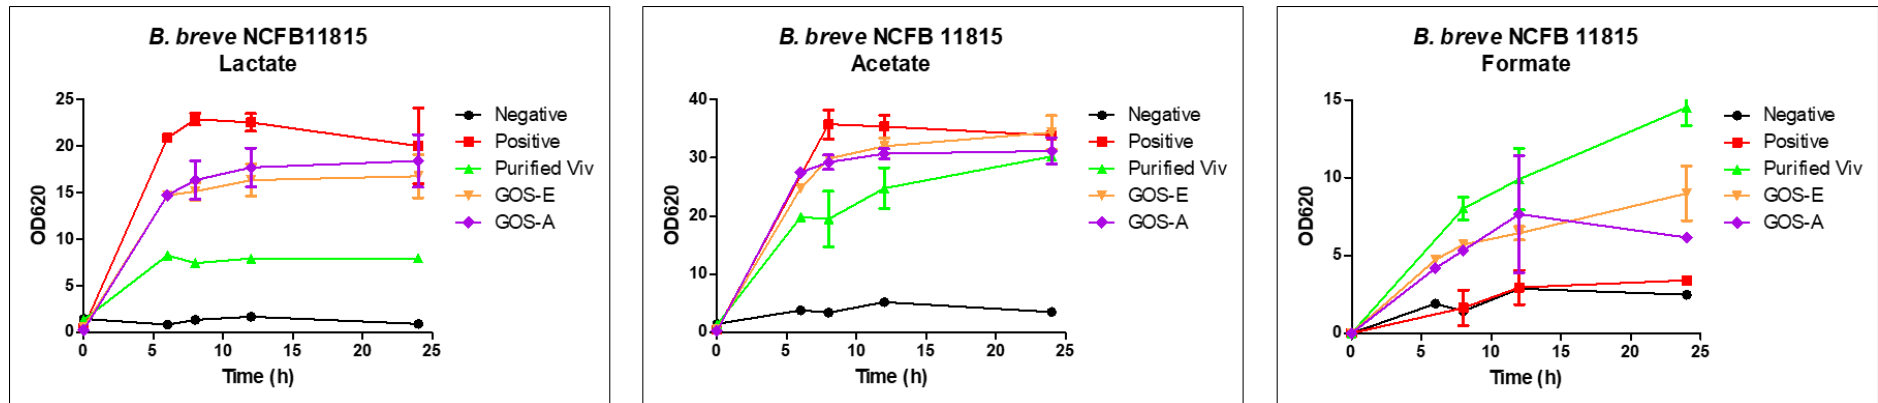

**Supplementary Figure S2.b** SCFA production resulting from *B. breve* NCFB11815 growth on novel purified GOS preparations. Negative: no sugar, Positive: lactose, Purified Viv: Pure Viv, GOS-E: purified GOS obtained by enzymatic reaction employing BgaE, GOS-A: purified GOS obtain by enzymatic reaction employing BgaA.



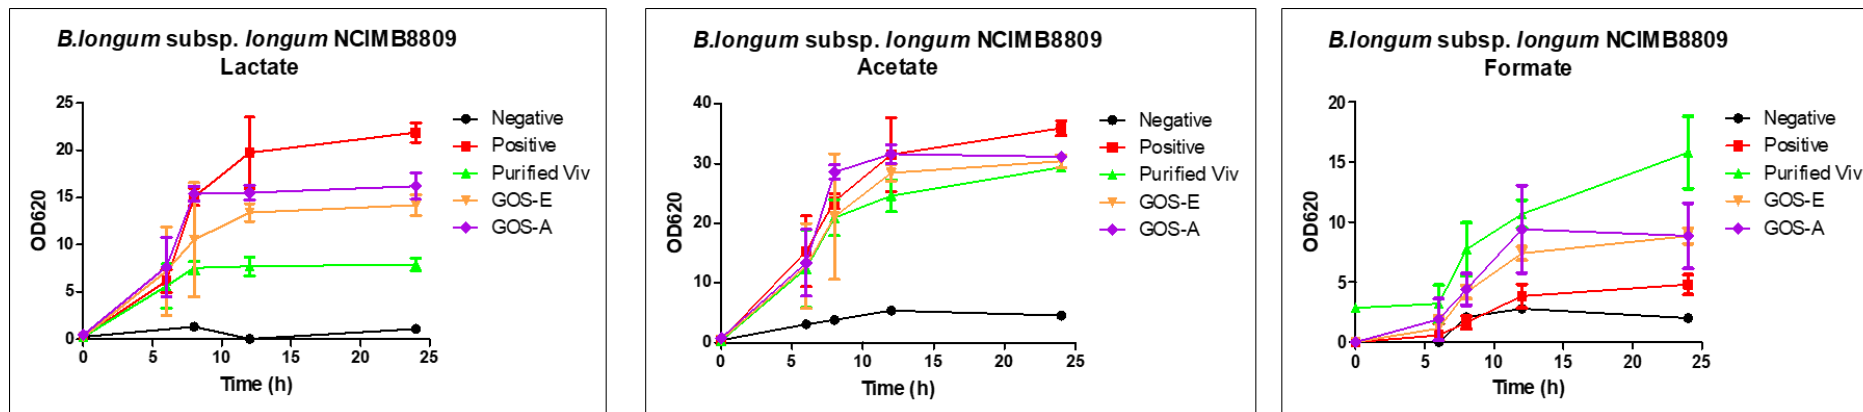

**Supplementary Figure S2.c** SCFA production resulting from *B. longum* subsp. *longum* NCIMB8809 growth on novel purified GOS

preparations. Negative: no sugar, Positive: lactose, Purified Viv: Pure Viv, GOS-E: purified GOS obtained by enzymatic reaction employing BgaE, GOS-A: purified GOS obtain by enzymatic reaction employing BgaA.

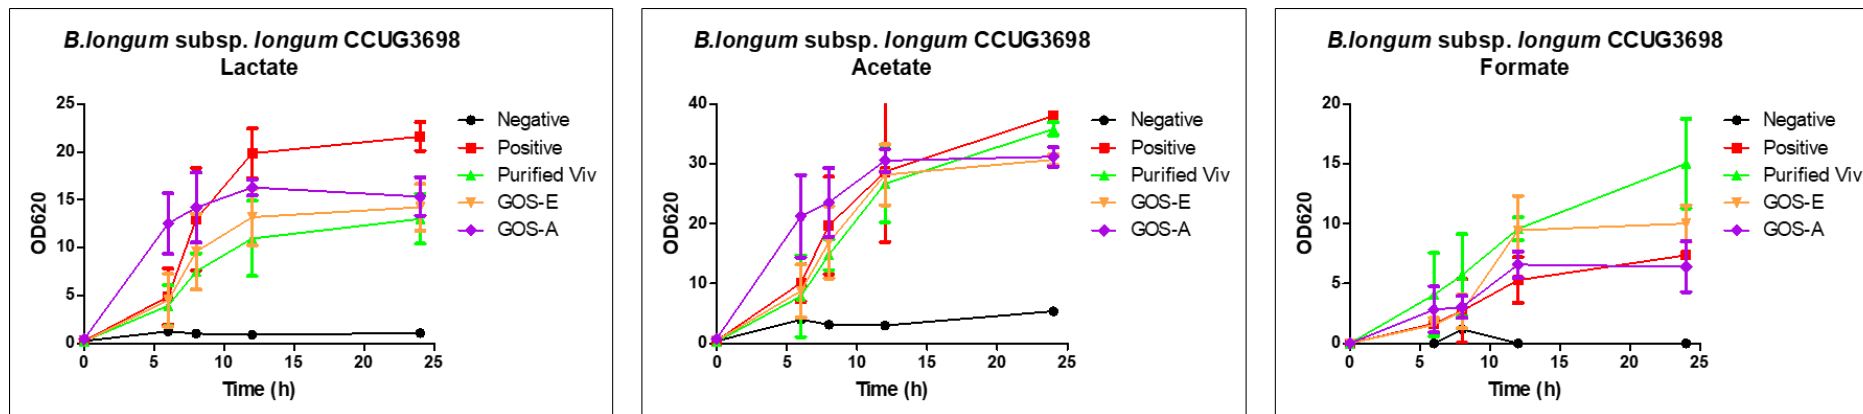

**Supplementary Figure S2.d**\_SCFA production resulting from *B. longum* subsp. *longum* CCUG3698 growth on novel purified GOS preparations.

Negative: no sugar, Positive: lactose, Purified Viv: Pure Viv, GOS-E: purified GOS obtained by enzymatic reaction employing BgaE, GOS-A: purified GOS obtain by enzymatic reaction employing BgaA.

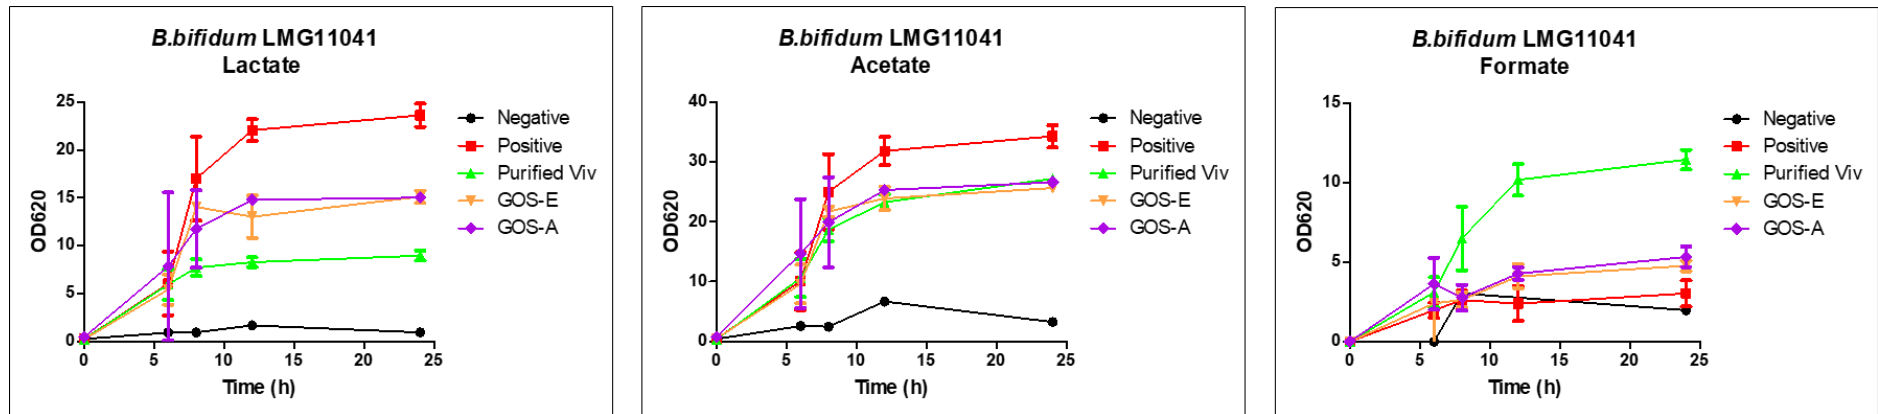

**Supplementary Figure S2.e** SCFA production resulting from *B. bifidum* LMG11041 growth on novel purified GOS preparations. Negative: no sugar, Positive: lactose, Purified Viv: Pure Viv, GOS-E: purified GOS obtained by enzymatic reaction employing BgaE, GOS-A: purified GOS obtain by enzymatic reaction employing BgaA.

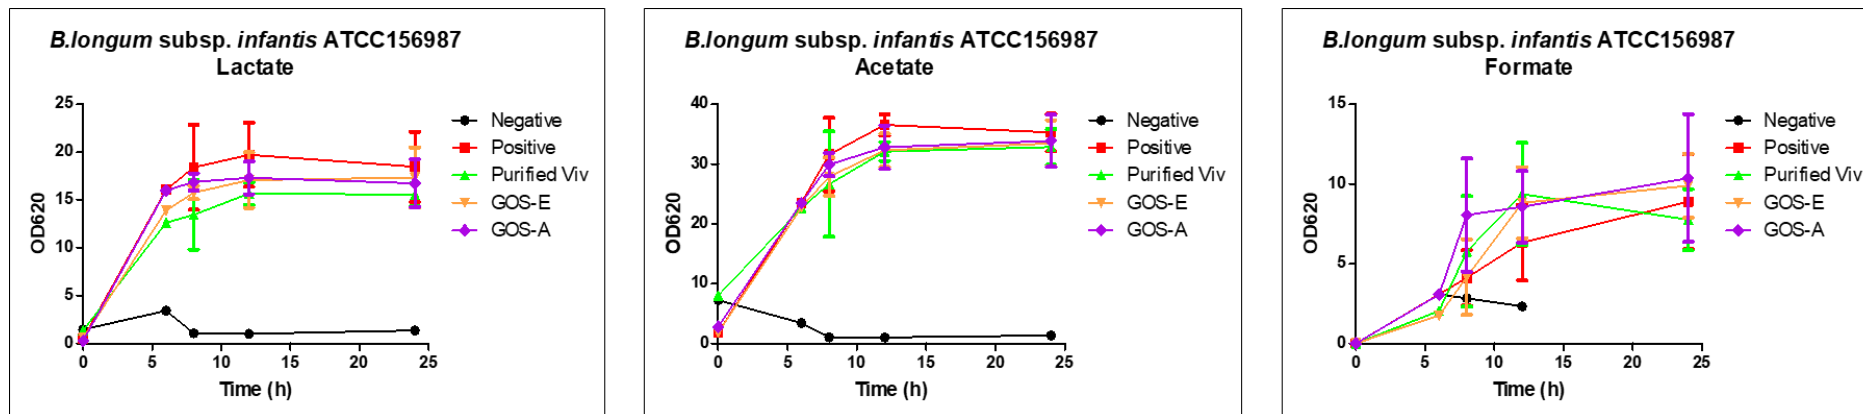

**Supplementary Figure S2.f** SCFA production resulting from *B. longum* subsp. *infantis* ATCC156987 growth on novel purified GOS

preparations. Negative: no sugar, Positive: lactose, Purified Viv: Pure Viv, GOS-E: purified GOS obtained by enzymatic reaction employing BgaE, GOS-A: purified GOS obtain by enzymatic reaction employing BgaA.

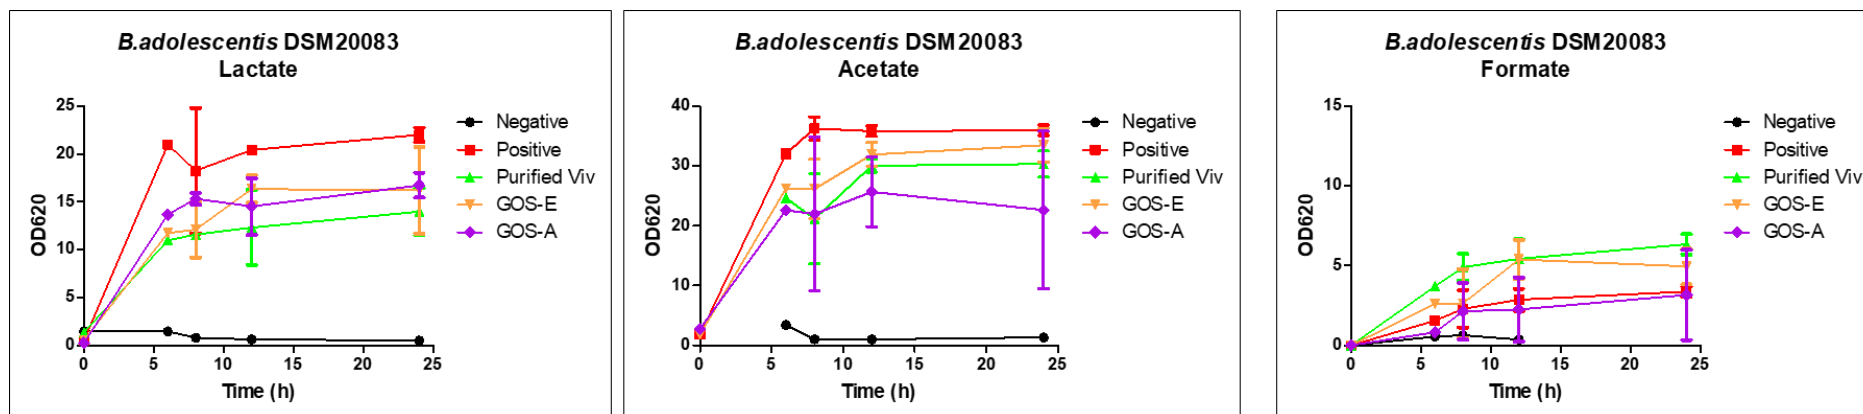

**Supplementary Figure S2.g** SCFA production resulting from *B.adolescentis* DSM20083 growth on novel purified GOS preparations. Negative: no sugar, Positive: lactose, Purified Viv: Pure Viv, GOS-E: purified GOS obtained by enzymatic reaction employing BgaE, GOS-A: purified GOS obtain by enzymatic reaction employing BgaA.

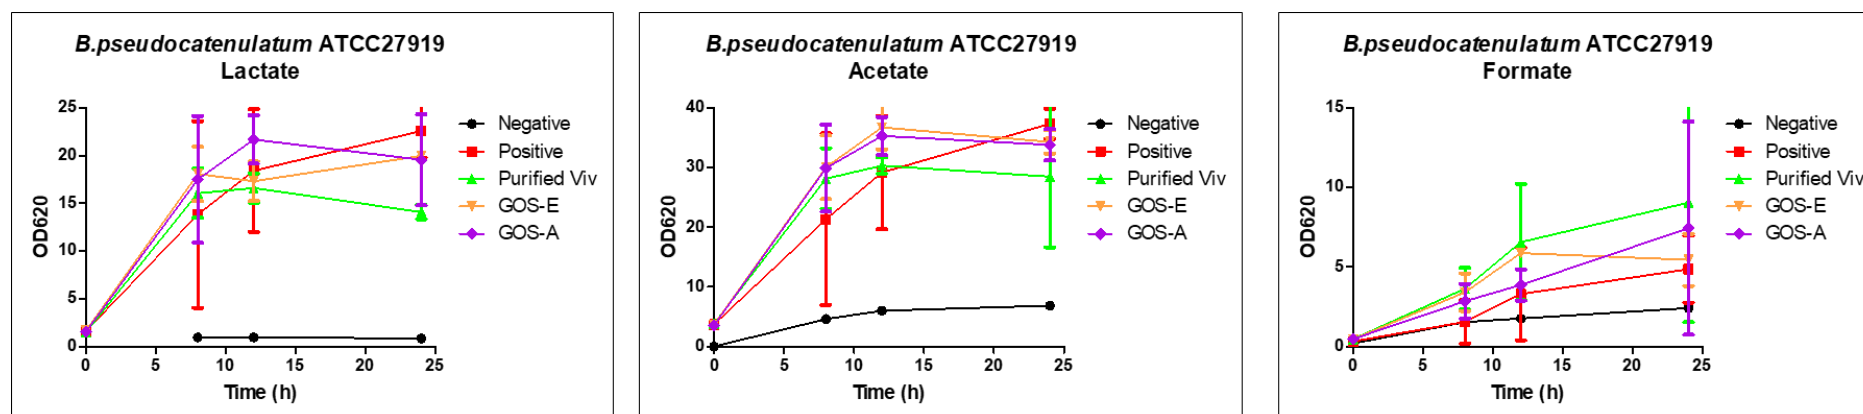

**Supplementary Figure S2.h** SCFA production resulting from *B.pseudocatenulatum* ATCC27919 growth on novel purified GOS preparations.

Negative: no sugar, Positive: lactose, Purified Viv: Pure Viv, GOS-E: purified GOS obtained by enzymatic reaction employing BgaE, GOS-A: purified GOS obtain by enzymatic reaction employing BgaA.

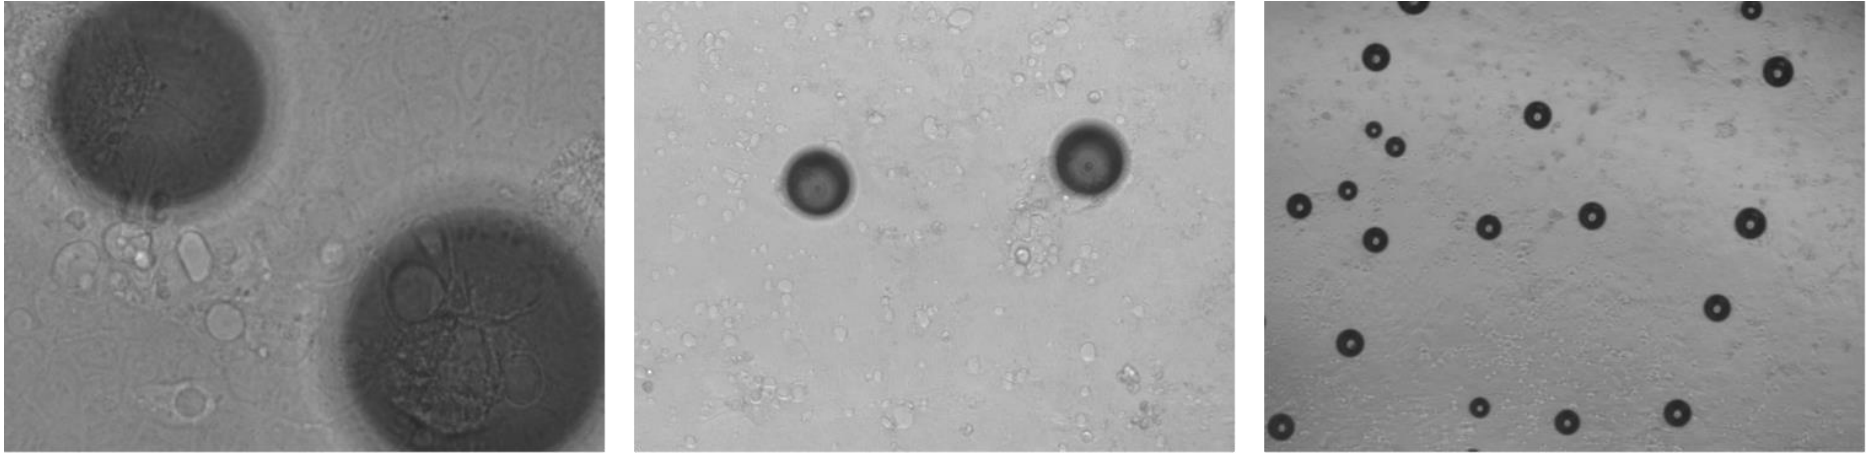

**Supplementary Figure S3.** C2BBel cell line infected with *Salmonella typhimurium* 4/74, micro bubble formation.
